# Supplementary material for: Abnormal Social Interactions in a Drosophila Mutant of an Autism Candidate Gene: Neuroligin 3
Source: PubMed Central journal article supplement (PMC7370170; doi:10.3390/ijms21134601), 2020-06-29
Supplement: ijms-21-04601-s001.pdf [file ijms-21-04601-s001.pdf]

## Supplemental Data - Abnormal social interactions in a *Drosophila* mutant of an autism candidate gene: *neuroligin 3*

Ryley T. Yost<sup>1#</sup>, J. Wesley Robinson<sup>1#</sup>, Carling M. Baxter<sup>2</sup>, Andrew M. Scott<sup>2</sup>, Liam P. Brown<sup>1</sup>, M. Sol Aletta<sup>1</sup>, Ramtin Hakimjavadi<sup>1</sup>, Asad Lone<sup>1</sup>, Reuven Dukas<sup>2</sup>, Robert C. Cumming<sup>1</sup>, Brian Mozer<sup>3</sup> and Anne F. Simon<sup>1,\*</sup>

<sup>1</sup> Western University; <sup>2</sup>McMaster University; <sup>3</sup> Office of Research Integrity, OASH, Rockville, MD

\* Correspondence: asimon28@uwo.ca; Tel: +1-519-661-2111X80084 (ON, Canada)

# equal contribution

### Results

#### *Low nlg3 transcript level is confirmed by ddPCR*

For absolute quantification of *nlg3* transcript level, ddPCR was performed on cDNA generated from head tissue. The *nlg3* transcript was expressed at an extremely low level in comparison to the stably transcribed reference gene, *ribosomal protein L32* (*rpl32*). The mean total number of droplets generated for the ddPCR run was 10,548. The mean concentration of input cDNA present was 21 copies/ $\mu$ L for *nlg3*, and 2,520 copies/ $\mu$ L for *rpl32* (Supplemental Figure S1). To account for the dilution factor of input cDNA, the copy number per 20  $\mu$ L reaction was multiplied by 10 for *nlg3* and by 100 for *rpl32* to estimate the initial copy number of the gene target in undiluted cDNA. The transcript abundance was approximately 1000-fold lower than that of *rpl32*, thereby confirming low copy number of the *nlg3*.

### Material and Methods

#### *Western Blot*

Refer to materials and methods in the main text for Western blots methods.

#### *Droplet digital PCR*

To quantify *nlg3* in *D. melanogaster*, a droplet digital PCR (ddPCR) assay was developed using novel primers targeting exons 11–13 (F: 5'-ACTGGTCCAACCTTTGTGCGA-3', R: 5'-GCTTCGGCTTGGTGTCAAAA-3'). Quantification of the housekeeping gene *rpl32* was performed using primers reported previously [1]. Total RNA was isolated from the heads of 50 four-day old mixed-sex *D. melanogaster* by TRIzol<sup>TM</sup> Reagent (Invitrogen, Waltham, Massachusetts, USA) isolation. RNA was quantified by spectrophotometry using a NanoPhotometer P300 (Implen Inc., Westlake Village, CA, USA), genomic DNA was removed using the TURBO DNA-free<sup>TM</sup> Kit (Invitrogen, Waltham, Massachusetts, USA), and cDNA was synthesized using the iScript<sup>TM</sup> cDNA Synthesis Kit (BioRad, Mississauga, ON, Canada). PCR amplification of *nlg3* and *rpl32* [1] was performed in triplicate 20  $\mu$ L reactions, using QX200<sup>TM</sup> ddPCR<sup>TM</sup> EvaGreen<sup>®</sup> Supermix (BioRad, Mississauga, ON, Canada), 100 nM each of forward and reverse primers, and 1  $\mu$ L diluted input cDNA (1:10 for *nlg3*, 1:100 for *Rpl32*). PCR was performed under the following thermocycling conditions, with a ramp rate of 2°C / s for each step: Initial denaturation for 5 min at 95°C; 45 cycles of denaturation (30s, 95°C), annealing and extension (30 s, 58°C); signal stabilization for 5 min at 4°C then 5 min at 90°C. Droplets were analyzed using the QX200<sup>TM</sup> Droplet Reader with QuantaSoft software (v1.7.4.0917, BioRad, Mississauga, ON, Canada). The initial copy number of the gene target per 20  $\mu$ L reaction (initial copy number per 1  $\mu$ L diluted input cDNA) was calculated by the software.

## References

1. Ling D.; Salvaterra P. M., Robust RT-qPCR data normalization: Validation and selection of internal reference genes during post-experimental data analysis. *PLoS ONE* **2011**, *6*, e17762.

## Supplemental Figures

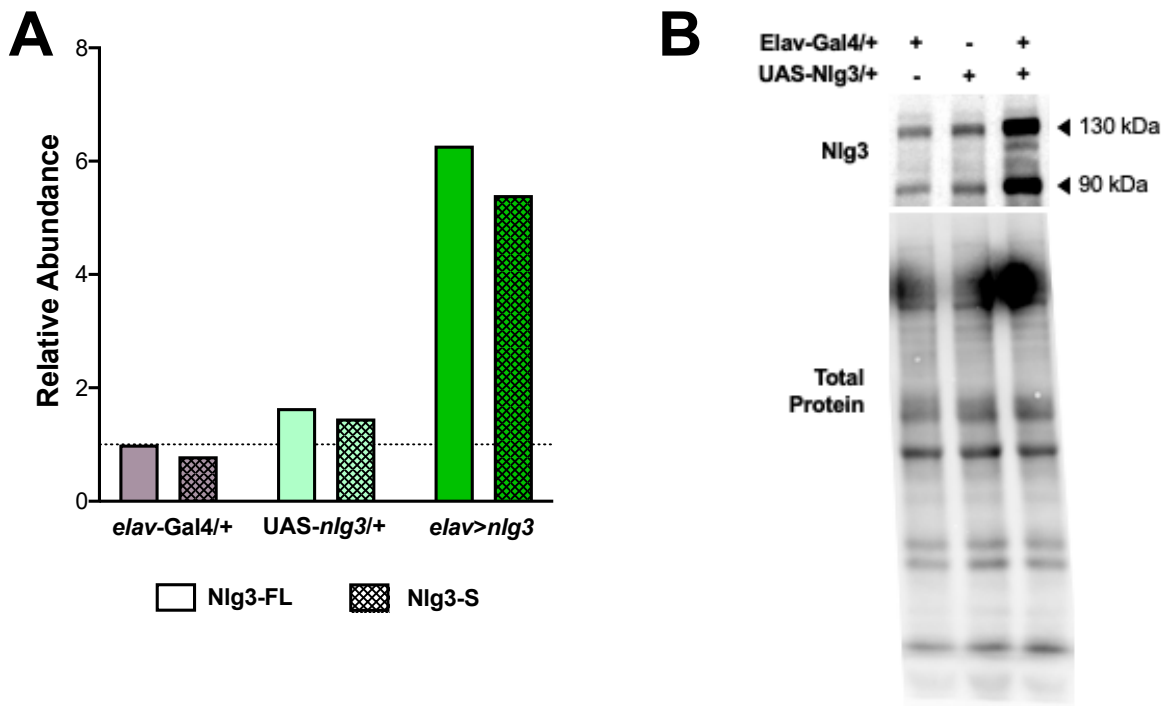

**Supplementary Figure S1. Western blot confirmation of Nlg3 overexpression.** (A) Nlg3 protein abundance in *elav>nlg3*. All treatments are displayed as relative abundance and normalized to Nlg3-FL in the *elav-Gal4/+* control.  $n=1$  for all treatments. (B) Representative Western blot of anti-Nlg3 immunoreactivity is displayed for each driver and the overexpression for Nlg3 for both protein isoforms. All treatments are normalized to total protein observed using BioRad stain-free technology. Each treatment is mixed sex with 10 males and 10 females. Of note: Nlg3 levels were not different in *elav-Gal4/+* compared to Canton-S (data not shown).

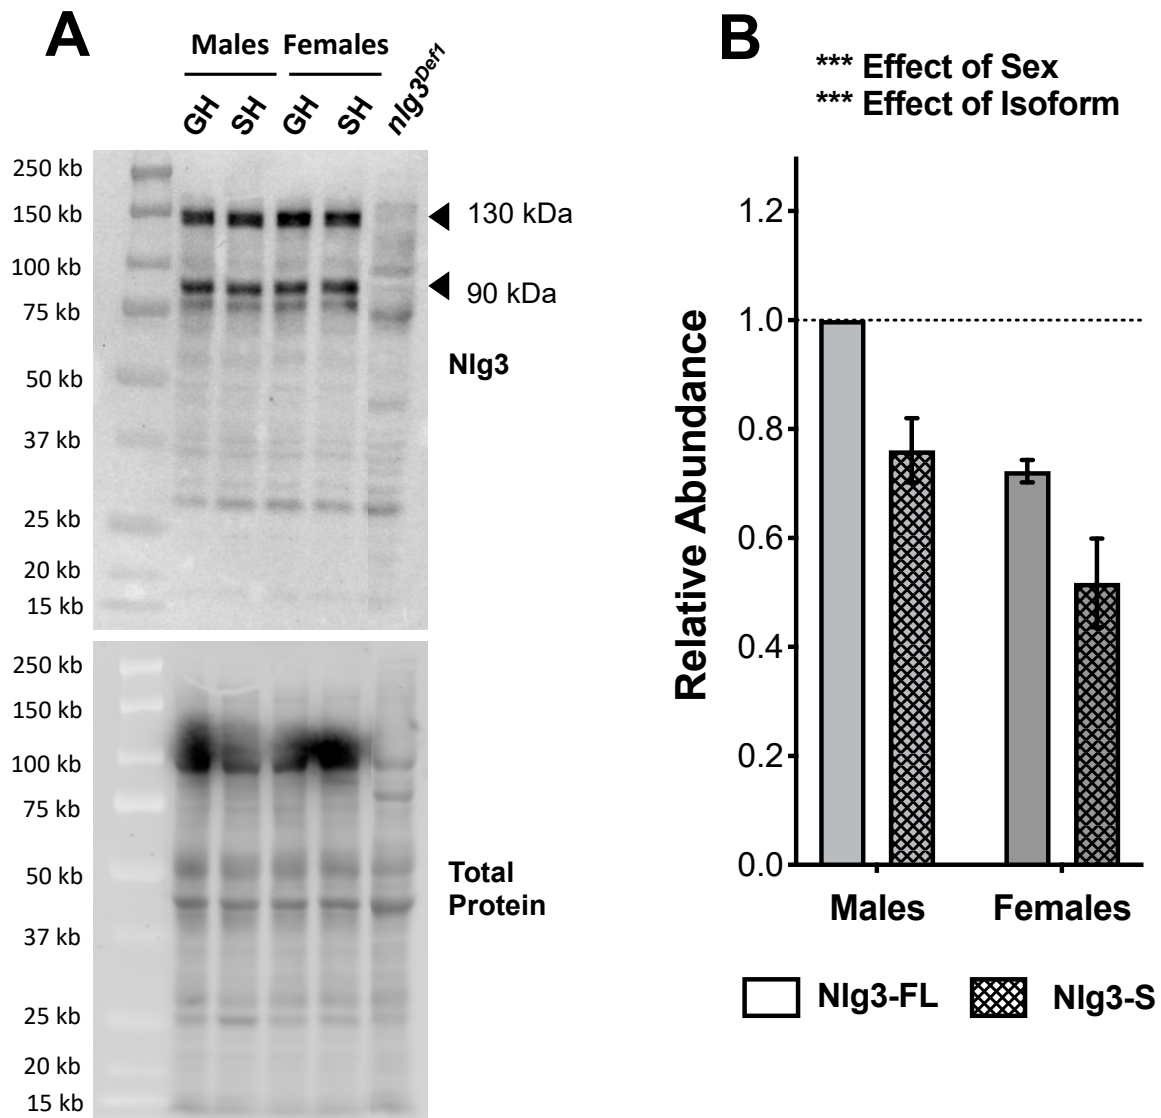

**Supplementary Figure S2. Representative whole blot images with molecular weight markers and total protein (A) for group and single housed Cs (Figure 5C, D) including a male to female comparison in protein abundance (B). (A)** Western blot of anti-Nlg3 is displayed (top image), along with total protein (bottom image). Lane 1 in each image is the molecular weight marker. Each treatment is mixed sex with 10 males and 10 females. **(B)** Mean protein abundance  $\pm$  s.e.m. in male and female Cs. Group housed female Cs had lower protein levels than group housed males (two-way ANOVA:  $F_{1,12}=18.81$ ,  $P=0.001$ ) and both sexes had lower Nlg3-S than Nlg3-FL (two-way ANOVA:  $F_{1,12}=25.90$ ,  $P=0.0003$ ). All treatments are displayed as relative abundance to male Nlg3-FL.  $n=4$  for all treatments.

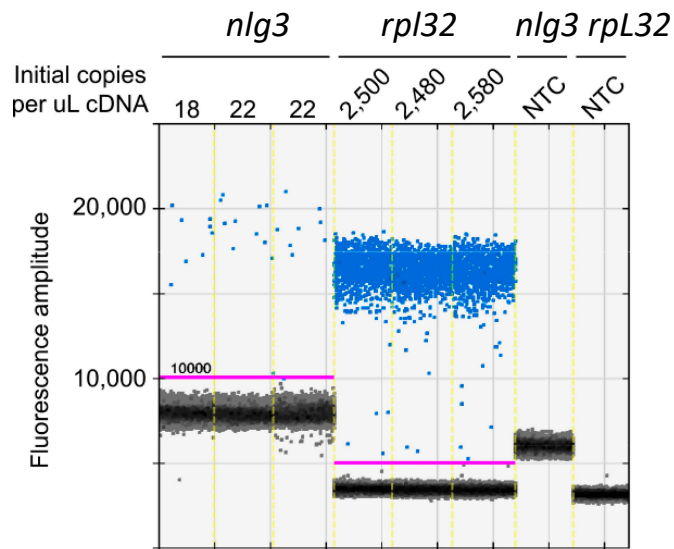

**Supplementary Figure S3. Scatter plot of a ddPCR assay displaying fluorescence amplitude and original cDNA copy number for *nlg3* and *rpl32* in *Cs*.** Treatments are separated by a yellow line. Purple line represents the fluorescence threshold. Above the threshold is a positive droplet for the cDNA of interest. Three technical replicates for *nlg3* and *rpl32* and one replicate for the no template controls were conducted. NTC: No template control.

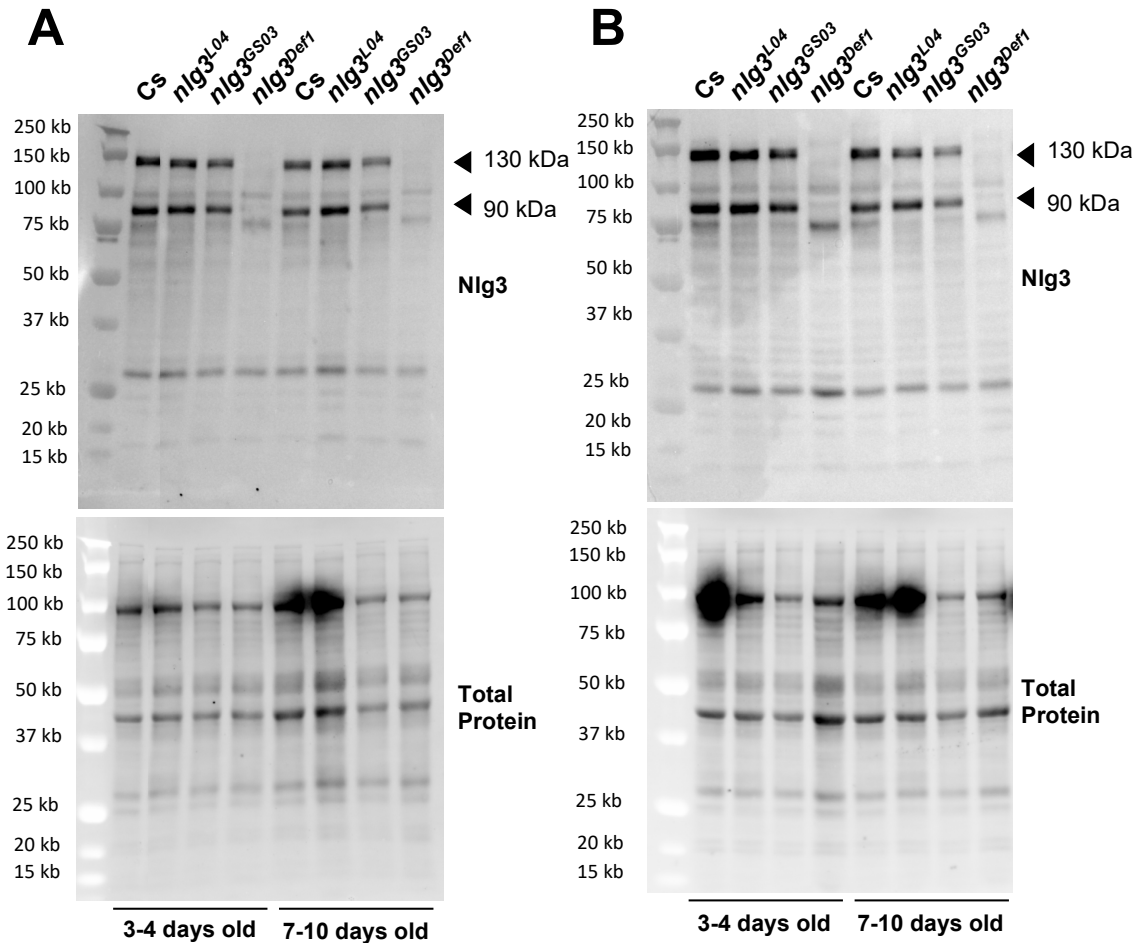

**Supplementary Figure S4. Representative whole blot images with molecular weight markers and total protein for *nlg3* mutants (Figure 1B-E) for males (A) and females (B).** Western blot of anti-Nlg3 is displayed for Cs and *nlg3* mutants (top image) and total protein (bottom image). Lane 1 in each image is the molecular weight marker. Each treatment is mixed sex with 10 males and 10 females.
